# Supplementary material
Source: MDPI journal article supplement (https://www.mdpi.com/1999-4907/12/8/1002)

Supplemental materials to:

## Functional Characterization of the Poplar Atypical Aspartic Protease Gene *PtAP66* in Wood Secondary Cell Wall Deposition

Shenquan Cao <sup>1</sup>, Cong Wang <sup>1</sup>, Huanhuan Ji <sup>1</sup>, Mengjie Guo <sup>1</sup>, Jiyao Cheng <sup>1</sup>, Yuxiang Cheng <sup>1\*</sup> and Chuanping Yang <sup>1\*</sup>

<sup>1</sup> State Key Laboratory of Tree Genetics and Breeding, Northeast Forestry University, 150040 Harbin, China; shenquanco@gmail.com (S.C.); cc1997121@163.com (C.W.); HuanJ0331@163.com (H.J.); mengjiegua0327@gmail.com (M.G.); chengjiyao1993@163.com (J.C.)

\* Correspondence: chengyuxiang@nefu.edu.cn (Y.C.), Tel.: +86-451-82192153; yangcp@nefu.edu.cn (C.Y.), Tel.: +86-451-82191086

**Table S1.** All primers used in this study

| Purpose                                                  | Primer Name       | Sequence (5'-3')                            |
|----------------------------------------------------------|-------------------|---------------------------------------------|
| Primers for subcellular localization vector construction |                   |                                             |
| <i>PtAP66/Potri.019G002100</i>                           | PtAP66-F          | <u>CACCATGGCTAATATGTCTTCTTTGTCT</u>         |
|                                                          | PtAP66-R          | TAGTTCATCACACTGTGTTGGAAG                    |
| Primers for CRISPR/Cas9 vectors construction             |                   |                                             |
| Cas9/gRNA-PtAP66-A                                       | DT1-BsF/PtAP66-A  | ATATATGGTCTCGATTGTTGTCTTTAGTCGTAGCACGTT     |
|                                                          | DT1-F0/PtAP66-A   | TGTTGTCTTTAGTCGTAGCACGTTTAGAGCTAGAAATAGC    |
|                                                          | DT2-R0/PtAP66-A   | AACGTGCCATTGCTTTGAATCTCAATCTCTTAGTCGACTCTAC |
|                                                          | DT2-BsR/PtAP66-A  | ATTATTGGTCTCTAAACGTGCCATTGCTTTGAATCTC       |
| Cas9/gRNA-PtAP66-B                                       | DT1-BsF/PtAP66-B  | ATATATGGTCTCGATTGAACATGTTTGAGCTTCGCTGTT     |
|                                                          | DT1-F0/PtAP66-B   | TGAACATGTTTGAGCTTCGCTGTTTAGAGCTAGAAATAGC    |
|                                                          | DT2-R0/PtAP66-B   | AACGTGTCCATTATTGCAGAATCAATCTCTTAGTCGACTCTAC |
|                                                          | DT2-BsR/PtAP66-B  | ATTATTGGTCTCTAAACGTGTCCATTATTGCAGAATC       |
| Primers used to identify Cas9-gRNAs targeted sites       |                   |                                             |
| gPtAP66-1/2/3/4-identify                                 | Identify PtAP66-F | GTCCTTGTCTAACCTACACAACC                     |
|                                                          | Identify PtAP66-R | ATATTGCGAGCCATCGCTGCAAG                     |
| Primers used for RT-qPCR                                 |                   |                                             |
| <i>PtAP66/Potri.019G002100</i>                           | PtAP66-RT-F       | CAAGTGTGAAAGCATCAGACAGTG                    |
|                                                          | PtAP66-RT-R       | CATGCTTGCATCGGCAATCATATAG                   |
| GFP                                                      | GFP-F             | ATGGTGAGCAAGGGCGAGGAGCT                     |
|                                                          | GFP-R             | CTTGTAAGCTCGTCCATGCCGT                      |
| <i>PtrCesA4/Potri.002G257900</i>                         | PtrCesA4-F        | GAGTTAAGGAAGATGGAGAGGTGT                    |
|                                                          | PtrCesA4-R        | TGCACTGAGGACAGGACTGGTTGC                    |

|                                    |               |                           |
|------------------------------------|---------------|---------------------------|
| <i>PtrCesA7A/Potri.006G181900</i>  | PtrCesA7A-F   | TCGCCTTTCTCTCAGATACGAACG  |
|                                    | PtrCesA7A-R   | TTACCCGTAACAAGAGGGGGTTCC  |
| <i>PtrCesA7B/Potri.018G103900</i>  | PtrCesA7B-F   | CCCCTCTAGTCACGGGCAACACAC  |
|                                    | PtrCesA7B-R   | AAGGTGCACATTGAAGCACCATCG  |
| <i>PtrCesA8A/Potri.011G069600</i>  | PtrCesA8A-F   | GTGGCCTCTGTCTTCTCTCTTGTCT |
|                                    | PtrCesA8A-R   | CAATCTATAGAAATGCAGGTTTCAC |
| <i>PtrCesA8B/Potri.004G059600</i>  | PtrCesA8B-F   | GTGGCCTCTGTCTTCTCTCTTGT   |
|                                    | PtrCesA8B-R   | CAATCAATGGAAATGCAGGTCTCCG |
| <i>PtrGT47A-1/Potri.001G068100</i> | PtrGT47A-1-F  | TCTCACACCCATGGGCT         |
|                                    | PtrGT47A-1-R  | AACGCTGGAGTAACGGG         |
| <i>PtrGT47C/Potri.009G006500</i>   | PtrGT47C-F    | GTGGGACCCAGACGTTAGGC      |
|                                    | PtrGT47C-R    | CTATTGGTTTGGAAGCCTCACG    |
| <i>PtrCSLA1/Potri.008G026400</i>   | PtrCSLA1-F    | ACATATTCCTCTTCCTCCAATCC   |
|                                    | PtrCSLA1-R    | CAAGAAAGATTCTTGCTAAGAGTG  |
| <i>PtrMYB021/Potri.009G053900</i>  | PtrMYB021-F   | CCTTAACAGTGGTGATCATGGTTT  |
|                                    | PtrMYB021-R   | TTACTAGTGATGTTGCAGTTTTGT  |
| <i>PtrMYB074/Potri.015G082700</i>  | PtrMYB074-F   | CATAAGTTAGAGTCGGTGTTCAC   |
|                                    | PtrMYB074-R   | CAGCGACGTTAACGGATAGCTAT   |
| <i>PtActin2</i>                    | PtActin2-RT-F | AACATGGGATTGTTAGCAACTGG   |
|                                    | PtActin2-RT-R | TCCATCACCAGAATCCAGCACA    |
| <i>AtActin2</i>                    | ATActin2-F    | TCTTCTTCCGCTCTTCTTTCC     |
|                                    | ATActin2-R    | TCTTACAATTTCCCGCTCTGC     |

Note: The sites for Topo cloning are underlined.

**Table S2.** The Cas9/gRNA-targeted mutations in *PtAP66* genes

| <b>Gene:</b> Potri.019G002100 ( <i>PtAP66</i> )                                                                                                                                                                                                                      |                                                          |                                                                           |              |                                                                              |                                                                           |              |
|----------------------------------------------------------------------------------------------------------------------------------------------------------------------------------------------------------------------------------------------------------------------|----------------------------------------------------------|---------------------------------------------------------------------------|--------------|------------------------------------------------------------------------------|---------------------------------------------------------------------------|--------------|
| <b>Vector:</b> Cas9/gRNA- <i>PtAP66</i> -A<br><b>gRNA:</b> <i>gPtAP66</i> -1 (TTTGTCTTTAGTCGTAGCACTGG); <i>gPtAP66</i> -2 (AAGATTCAAAGCAATGGCACTGG)<br><b>Target sequences:</b> <i>PtAP66</i> -1, TTTGTCTTTAGTCGTAGCACTGG; <i>PtAP66</i> -2, AAGATTCAAAGCAATGGCACTGG |                                                          |                                                                           |              |                                                                              |                                                                           |              |
| Line (#)                                                                                                                                                                                                                                                             | <i>gPtAP66</i> -1<br>TTTGTCTTTAGTCGTAGCACTGG             | Mutation types<br>(Number of plasmids containing the cloned PCR products) |              | <i>gPtAP66</i> -2<br>AAGATTCAAAGCAATGGCACTGG                                 | Mutation types<br>(Number of plasmids containing the cloned PCR products) |              |
| <i>ptap66</i> -1#                                                                                                                                                                                                                                                    | TTTGTCTTTAGTCGTAG(T)CACTGG<br>TTTGTCTTTAGTCGTAGCACTGG    | +1 (×12)<br>0 (×8)                                                        | heterozygous | AAGATTCAAAGCA.....CTGG<br>AAGATTCAAAGCAATGGCACTGG<br>AAGATTCAAAGC.....CACTGG | -6 (×11)<br>0 (×7)<br>-5 (×2)                                             | chimera      |
| <i>ptap66</i> -2#                                                                                                                                                                                                                                                    | TTTGTCTTTAGTCGTAG.....<br>TTTGTCTTTAGTCGTAGCACTGG        | -196 (×11)<br>0 (×9)                                                      | heterozygous | .....ACTGG<br>AAGATTCAAAGCAATGGCACTGG                                        | -196 (×11)<br>0 (×9)                                                      | heterozygous |
| <i>ptap66</i> -3#                                                                                                                                                                                                                                                    | TTTGTCTTTAGTCGTAG(A)CACTGG<br>TTTGTCTTTAGTCGTAG(T)CACTGG | +1 (×10)<br>+1 (×10)                                                      | biallelic    | AAGATTCAAAGCAA.....<br>AAGATTCAAA.....CTGG                                   | -11 (×10)<br>-9 (×10)                                                     | biallelic    |
| <i>ptap66</i> -4#                                                                                                                                                                                                                                                    | TTTGTCTTTAGTCGTAGC.....<br>TTTGTCTTTAGTCGTAG(T)CACTGG    | -197 (×12)<br>+1 (×8)                                                     | biallelic    | .....TGG<br>AAGATTCAAAGC.....CACTGG                                          | -197 (×12)<br>-5 (×8)                                                     | biallelic    |
| <b>Vector:</b> Cas9/gRNA- <i>PtAP66</i> -B<br><b>gRNA:</b> <i>gPtAP66</i> -3 (CCGAGCGAAGCTCAAACATGTTG); <i>gPtAP66</i> -4 (TATTCTGCAATAATGGACACAGG)<br><b>Target sequences:</b> <i>PtAP66</i> -3, CCGAGCGAAGCTCAAACATGTTG; <i>PtAP66</i> -4, TATTCTGCAATAATGGACACAGG |                                                          |                                                                           |              |                                                                              |                                                                           |              |
| Line (#)                                                                                                                                                                                                                                                             | <i>gPtAP66</i> -3<br>CCGAGCGAAGCTCAAACATGTTG             | Mutation types<br>(Number of plasmids containing the cloned PCR products) |              | <i>gPtAP66</i> -4<br>TATTCTGCAATAATGGACACAGG                                 | Mutation types<br>(Number of plasmids containing the cloned PCR products) |              |
| <i>ptap66</i> -5#                                                                                                                                                                                                                                                    | CCGAG.GAAGCTCAAACATGTTG<br>CCGAGC.....                   | -1 (×11)<br>-220 (×9)                                                     | biallelic    | TATTCTGCAATAATGG.CACAGG<br>.....ACAGG                                        | -1 (×11)<br>-220 (×9)                                                     | biallelic    |
| <i>ptap66</i> -6#                                                                                                                                                                                                                                                    | CCGAGC.....<br>CCGAGCGAAGCTCAAACATGTTG                   | -219 (×13)<br>0 (×7)                                                      | heterozygous | .....CACAGG<br>TATTCTGCAATAATGGACACAGG                                       | -219 (×13)<br>0 (×7)                                                      | heterozygous |

|                   |                                                    |                       |              |                                                       |                       |              |
|-------------------|----------------------------------------------------|-----------------------|--------------|-------------------------------------------------------|-----------------------|--------------|
| <i>ptap66-7#</i>  | CCGAGC.....<br>CCGAGCGAAGCTCAAACATGTTG             | -219 (×14)<br>0 (×6)  | heterozygous | .....CACAGG<br>TATT.TGCAATAA.....CACAGG               | -219 (×14)<br>-5 (×6) | biallelic    |
| <i>ptap66-8#</i>  | CCGAGCGAAGCTCAAACATGTTG<br>CCGAG.GAAGCTCAAACATGTTG | 0 (×9)<br>-1 (×11)    | heterozygous | TATTCTGCAATAATGGACACAGG<br>TATTCTGCAATAA(T)TGGACACAGG | 0 (×9)<br>+1 (×11)    | heterozygous |
| <i>ptap66-9#</i>  | CCGAGC.AAGCTCAAACATGTTG<br>CCGAGC.....             | -1 (×11)<br>-220 (×9) | biallelic    | TATTCTGCAATAATGGA(T)CACAGG<br>.....ACAGG              | +1 (×11)<br>-220 (×9) | biallelic    |
| <i>ptap66-10#</i> | CCGAG.GAAGCTCAAACATGTTG                            | -1 (×10)              | heterozygous | TATTCTGCAATAATGG.CACAGG                               | -1 (×10)              | heterozygous |
| <i>ptap66-11#</i> | CCGAGC.....<br>CCGAGCGAAGCTCAAACATGTTG             | -220 (×12)<br>0 (×8)  | heterozygous | .....ACAGG<br>TATTCTGCAATAATGGACACAGG                 | -220 (×12)<br>0 (×8)  | heterozygous |
| <i>ptap66-12#</i> | CCGAGC.....<br>CCGAGCGAAGCTCAAACATGTTG             | -220 (×11)<br>0 (×9)  | heterozygous | .....ACAGG<br>TATTCTGCAATAATGGACACAGG                 | -220 (×11)<br>0 (×9)  | heterozygous |

Biallelic, two alleles of the gene were edited and the different mutations were induced. Chimeric, more than three different allelic mutations in a target editing site of the gene.

**Figure S1.** Multiple sequence alignment of PtAP66 with some APs in plants. PtAP66 and PtAP5 are from *Populus*. ASPR1, CDR1, PCS1 and PASPA3 are from *Arabidopsis*. Nucellin is from barley. Cardosin A is from Cardoons. Cardosin A and PASPA3 have the PSI domain and are the typical APs. The PSI sequences are in blue frame. Nucellin belongs to the Nucellin-like APs. ASPR1, CDR1, PCS1, PtAP66 and PtAP5 are the atypical APs. Both the atypical and Nucellin-like APs do not have the PSI domain. The two conserved aspartic acid catalytic residues of PtAP66 are marked with red asterisk.

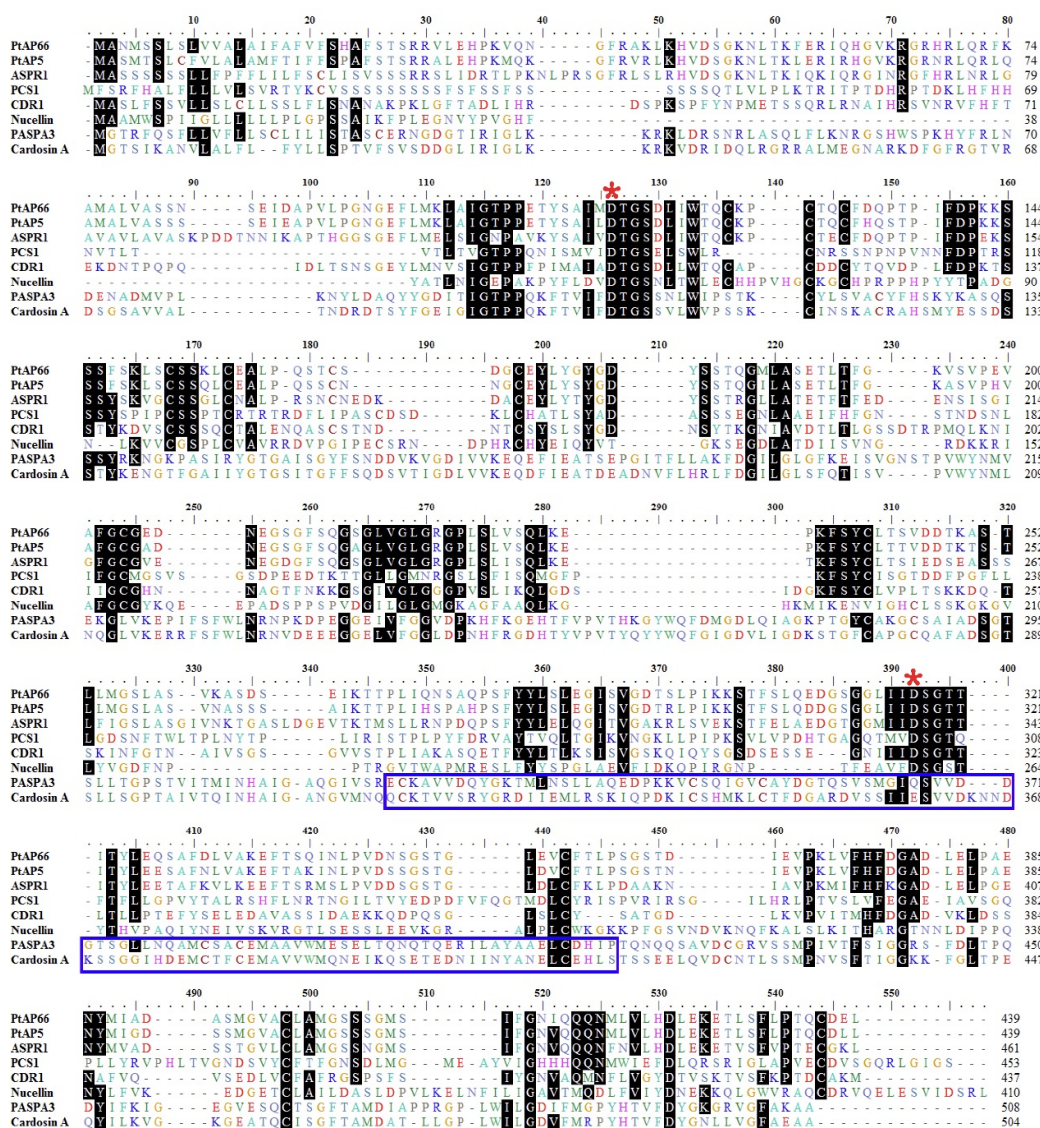

**Figure S2.** Phenotypes analyses of 4-month-old WT and the *ptap66* mutant plants. The WT and *ptap66* mutant plants grown in the greenhouse, these plants were measured for internode number (a), internode length (b), leaf length (c) and leaf width (d) at 4-month-old. Error bars represent  $\pm$  SD values of six biological replicates.

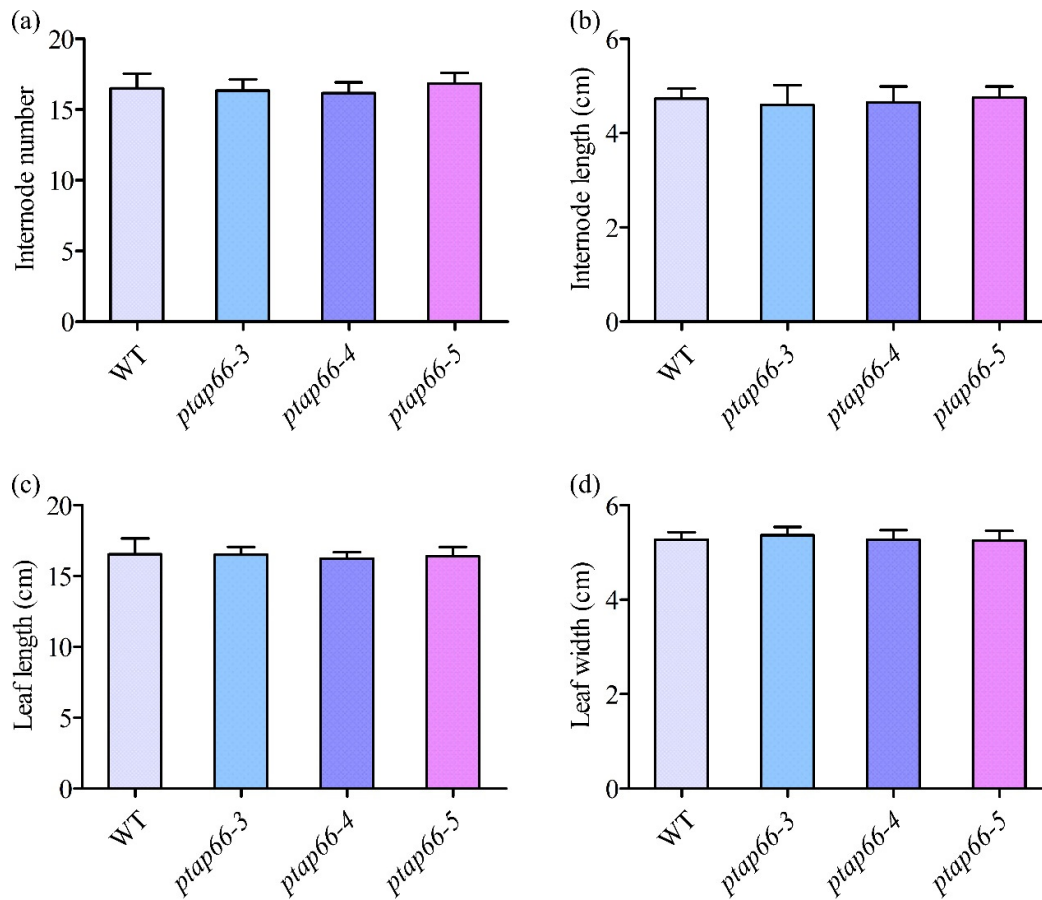

Supplement: s1 [file s1]
